# Supplementary material for: Optimal Heart Rate May Improve Systolic and Diastolic Function in Patients with Fontan Circulation
Source: MDPI journal article supplement (doi:10.3390/jcm12083033), 2023-04-21
Supplement: s1 [file s1]

Supplemental Table S1. Inter-rater reliability for echocardiographic measurements

| Echocardiographic measurements | Correlation coefficients |
|--------------------------------|--------------------------|
| Baseline                       |                          |
| Fraction area change           | 0.8554                   |
| E-wave                         | 0.9640                   |
| E-wave deceleration time       | 0.7147                   |
| A-wave                         | 0.9547                   |
| Overlap length                 | 0.9116                   |
| Follow-up                      |                          |
| Fraction area change           | 0.7173                   |
| E-wave                         | 0.9918                   |
| E-wave deceleration time       | 0.9520                   |
| A-wave                         | 0.8374                   |
| Overlap length                 | 0.9325                   |
